# Supplementary material for: Epidermal Wnt signalling regulates transcriptome heterogeneity and proliferative fate in neighbouring cells
Source: PubMed Central journal article supplement (PMC5769491; doi:10.1186/s13059-017-1384-y), 2018-01-15
Supplement: 13059_2017_1384_MOESM1_ESM.pdf [file 13059_2017_1384_MOESM1_ESM.pdf]

**Additional File 1: Supplementary figures for:**

**Epidermal Wnt signalling regulates transcriptome heterogeneity and proliferative fate in neighbouring cells**

Arsham Ghahramani<sup>1,2</sup>, Giacomo Donati<sup>2,3</sup>, Nicholas M. Luscombe<sup>1,4,5,†</sup> and Fiona M. Watt<sup>2,†</sup>

<sup>1</sup>The Francis Crick Institute, 1 Midland Road, London NW1 1AT, United Kingdom

<sup>2</sup>King's College London, Centre for Stem Cells and Regenerative Medicine, 28th 8 Floor, Tower Wing, Guy's Hospital, Great Maze Pond, London SE1 9RT, United Kingdom

<sup>3</sup>Department of Life Sciences and Systems Biology, University of Turin, Via Accademia Albertina 13, 10123 Torino, Italy

<sup>4</sup>UCL Genetics Institute, University College London, London WC1E 6BT, United Kingdom

<sup>5</sup>Okinawa Institute of Science & Technology Graduate University, Okinawa 904-0495, Japan

† Correspondence to: [fiona.watt@kcl.ac.uk](mailto:fiona.watt@kcl.ac.uk) and [nicholas.luscombe@crick.ac.uk](mailto:nicholas.luscombe@crick.ac.uk)

## Supplementary Figures

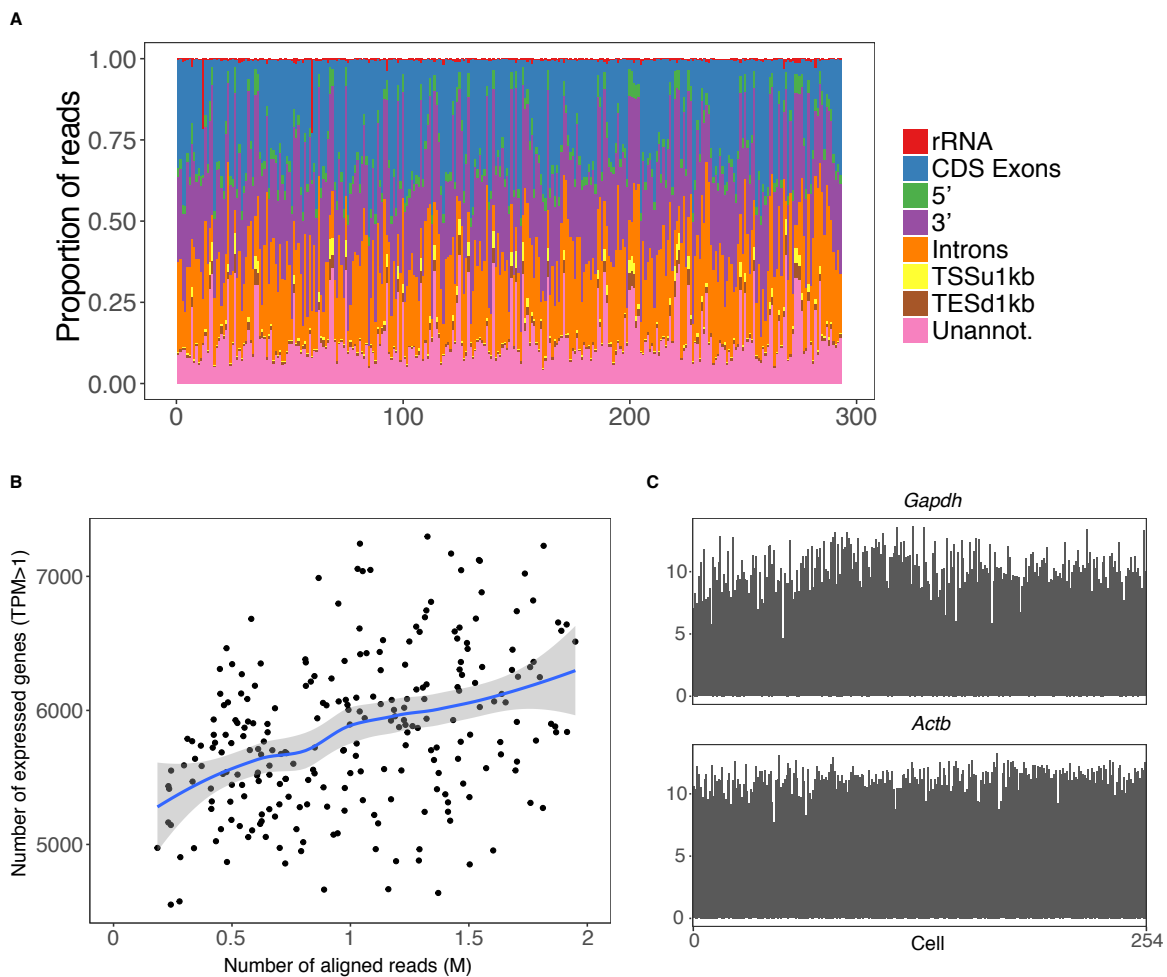

**Figure S1. Quality control of single cell RNA-seq libraries**

**A)** Stacked proportional barplot showing read alignment coverage distribution for all cells before QC filtering. TSSu1kb - region up to 1kb upstream of the transcription start site. TESd1kb - region up to 1kb downstream of the transcription end site. Unannot. - unannotated intergenic regions.

**B)** Scatter plot showing relation between number of aligned reads and number of genes detected as expressed (TPM > 1).

**C)** Barplots showing expression of two ubiquitously expressed genes (*Gapdh*, *Actb*) for 254 cells which have passed QC filtering.

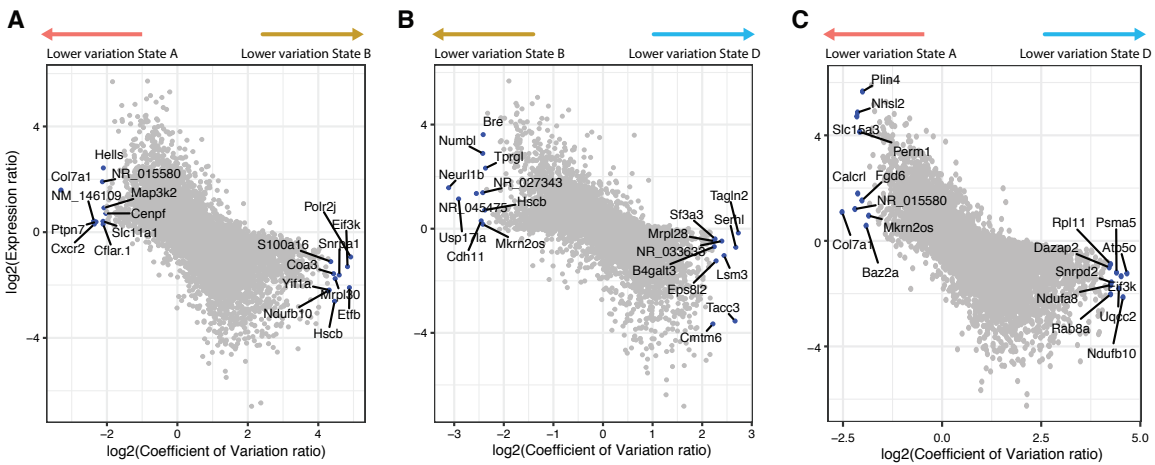

**Figure S2. Comparison of heterogeneity and expression between transition states**  
 A-C) Scatterplots showing the log-ratio of coefficient of variation versus the log-ratio of gene expression between pairs of pseudotransition states.
